# Supplementary material
Source: Springer Nature journal article supplement (https://www.springermedizin.de/resource/supplementary/12882_2012_411_MOESM4_ESM.pdf/9453712)

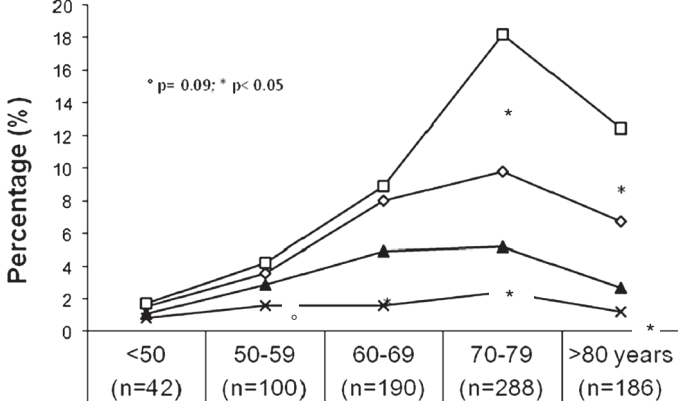

|                           |     |     |     |      |      |
|---------------------------|-----|-----|-----|------|------|
| —◇— Men RI (%)            | 1.5 | 3.6 | 8   | 9.8  | 6.7  |
| —□— Women RI (%)          | 1.7 | 4.2 | 8.9 | 18.2 | 12.4 |
| —▲— Men albuminuria (%)   | 1.1 | 2.9 | 4.9 | 5.2  | 2.7  |
| —×— Women albuminuria (%) | 0.8 | 1.6 | 1.6 | 2.4  | 1.2  |

Supplement: MOESM4 [file 9453712]
